# Supplementary material for: Enhancing mass analysis of ultra-high molecular weight polystyrene: a comparative study of copper and silver salts with MALDI mass spectrometry
Source: Royal Society of Chemistry journal article supplement (doi:10.1039/d4ay02077d), 2025-01-01
Supplement: d4ay02077d1.pdf [file d4ay02077d1.pdf]

## Supporting Information

### **Enhancing Mass Analysis of Ultra-High Molecular Weight Polystyrene: A Comparative Study of Copper and Silver Salts with MALDI Mass Spectrometry**

Avinash A. Patil<sup>1\*</sup>; Thị Khánh Ly Lại<sup>1\*</sup>; Ching-Chieh Lee<sup>1</sup>, Yi-Pang Chiu<sup>1</sup>; Zhe-Xuan Liu<sup>1</sup>; Che-Jen Lin<sup>2</sup>; Wen-Ping Peng<sup>1†</sup>

<sup>1</sup>Department of Physics, National Dong Hwa University, Shoufeng, Hualien, Taiwan 97401

<sup>2</sup>Department of Chemistry, National Dong Hwa University, Shoufeng, Hualien, Taiwan 97401

Table S1 The experimental conditions used to obtain different polystyrene mass spectra using MALDI LIT-MS

| Experimental Parameters |                               | Polystyrene |        |        |        |
|-------------------------|-------------------------------|-------------|--------|--------|--------|
|                         |                               | PS210k      | PS650k | PS900k | PS2M   |
| Q1                      | RF Frequency $f$ (kHz)        | 201         | 82     | 82     | 51     |
|                         | RF Amplitude $kV_{p-p}$       | 1.5         | 1      | 1.4    | 1.2    |
|                         | LMCO (Dalton)                 | 26769       | 107226 | 150116 | 332636 |
| LIT                     | RF Frequency $f$ (kHz), Start | 70433       | 39843  | 32539  | 23004  |
|                         | RF Frequency $f$ (kHz), End   | 16266       | 10649  | 10649  | 7274   |
|                         | RF Amplitude $V_{p-p}$        | 560         | 560    | 560    | 560    |
|                         | Auxiliary AC $V_{p-p}$        | 54          | 72     | 84     | 84     |
|                         | LMCO (Dalton)                 | 32k         | 100k   | 150k   | 300k   |
|                         | Cooling time (ms)             | 800         | 800    | 800    | 800    |
|                         | Scanning time (ms)            | 500         | 500    | 500    | 500    |

Table S2 The molecular weight data measured using MALDI LIT-MS for a variety of UHMW PS standards and cationization reagents.

| PS     | MALDI LIT-MS           | gel permeation chromatography (GPC)* |           |           |                           | Light scattering <sup>§</sup> |
|--------|------------------------|--------------------------------------|-----------|-----------|---------------------------|-------------------------------|
|        | Molecular Weight (Da)  | Molecular Weight (Da)                |           |           | $\frac{M_w}{M_n}$<br>PDI= | Molecular Weight (Da)         |
|        | $M_w$ (At peak center) | $M_n$                                | $M_w$     | $M_p$     |                           | $M_w$                         |
| PS210k | 240,056                | 211,400                              | 213,600   | 218,500   | ≤1.01                     | 211600                        |
| PS650k | 606,178                | 617,600                              | 649,400   | 648,800   | ≤1.06                     | 670,000                       |
| PS900k | 945,500                | 892,000                              | 942,000   | 949,000   | ≤1.10                     | 929,000                       |
| PS2M   | 2,006,169              | 1,524,000                            | 1,971,000 | 2,161,000 | ≤1.30                     | 1,971,000                     |

\* Molecular weight measured using gel permeation chromatography by supplier.

§ Molecular weight measured using Light scattering method by supplier.

$M_p$  = molecular weight of the highest peak

Table S3 Polystyrene concentrations used to optimize the concentration ratio of PS : matrix : cationization salt using DCTB matrix (0.1 M) and AgNO<sub>3</sub> salt (0.15 M) at fixed concentration.

The red-colored numbers represent the best concentration condition for each PS standard which resulted in the highest signal intensity.

| Serial No. | Polystyrene molar concentration (M) |                |                |
|------------|-------------------------------------|----------------|----------------|
|            | PS210k                              | PS650k         | PS900k         |
| 1          | 1.0E-05                             | 1.0E-06        | 1.0E-07        |
| <b>2</b>   | <b>5.0E-05</b>                      | 5.0E-06        | 5.0E-07        |
| 3          | 1.5E-04                             | <b>1.0E-05</b> | 1.0E-06        |
| 4          | 5.0E-04                             | 5.0E-05        | <b>5.0E-06</b> |
| 5          |                                     | 1.0E-04        | 1.0E-05        |

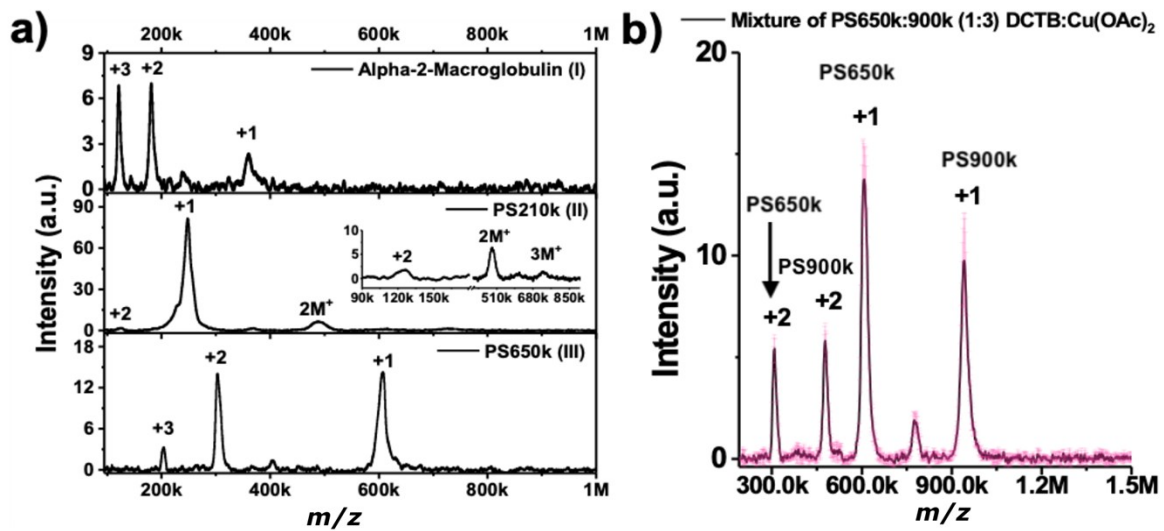

Figure S1 a) Mass spectrum of I) alpha-2-macroglobulin acquired with SA matrix and mass spectra of II) PS210k, and III) PS650k obtained with a DCTB matrix and  $\text{Cu}(\text{OAc})_2$  salt. All mass spectra were acquired at similar ion trapping and experimental conditions. b) Mass spectra of PS650k and PS900k mixture with the mixing ratio of 1:3 obtained with a DCTB matrix and  $\text{Cu}(\text{OAc})_2$  salt.

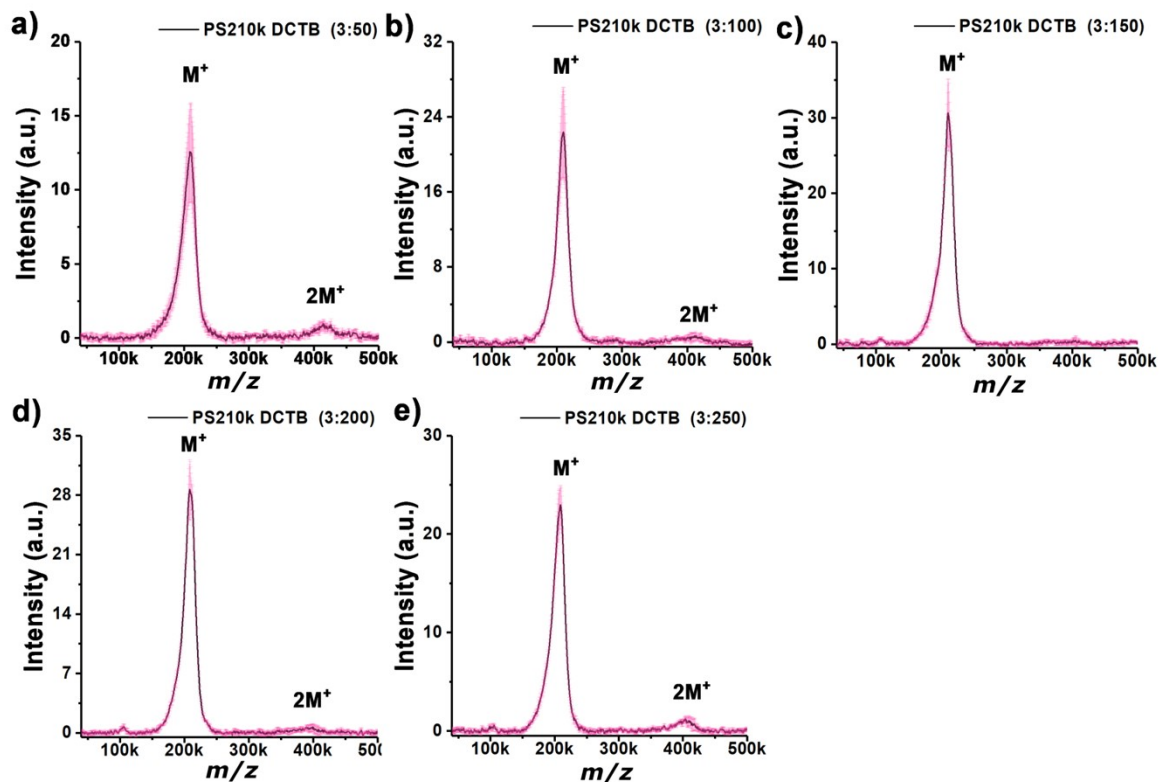

Figure S2 Mass spectra of PS210k obtained using DCTB matrix with PS : matrix concentration (v/v) ratios of a) 3:50, b) 3:100, c) 3:150, d) 3:200, and e) 3:250.

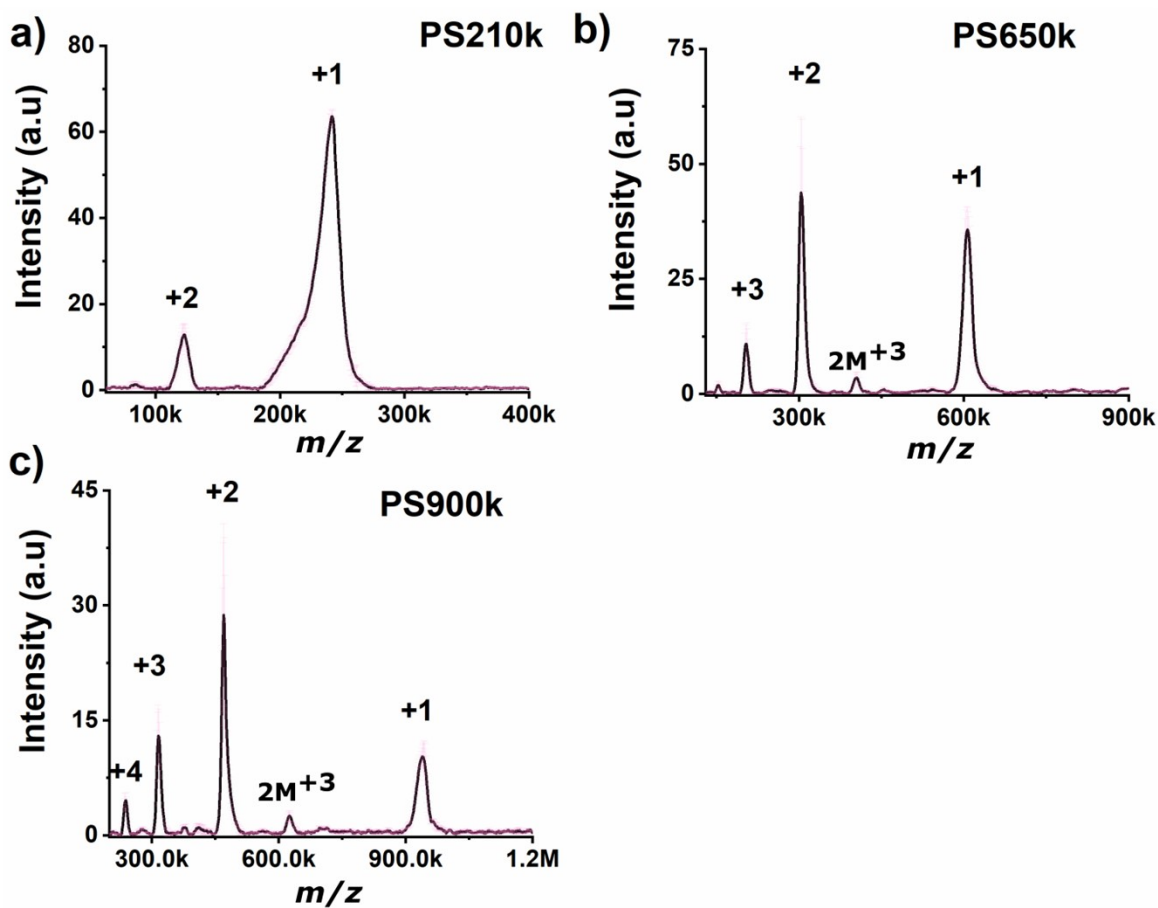

Figure S3 Mass spectra of a) PS210k, b) PS650k, and c) PS900k obtained with a DCTB matrix and  $\text{AgNO}_3$  salt at the optimized ratio of PS: matrix:  $\text{AgNO}_3$  concentration conditions listed in Table 1.

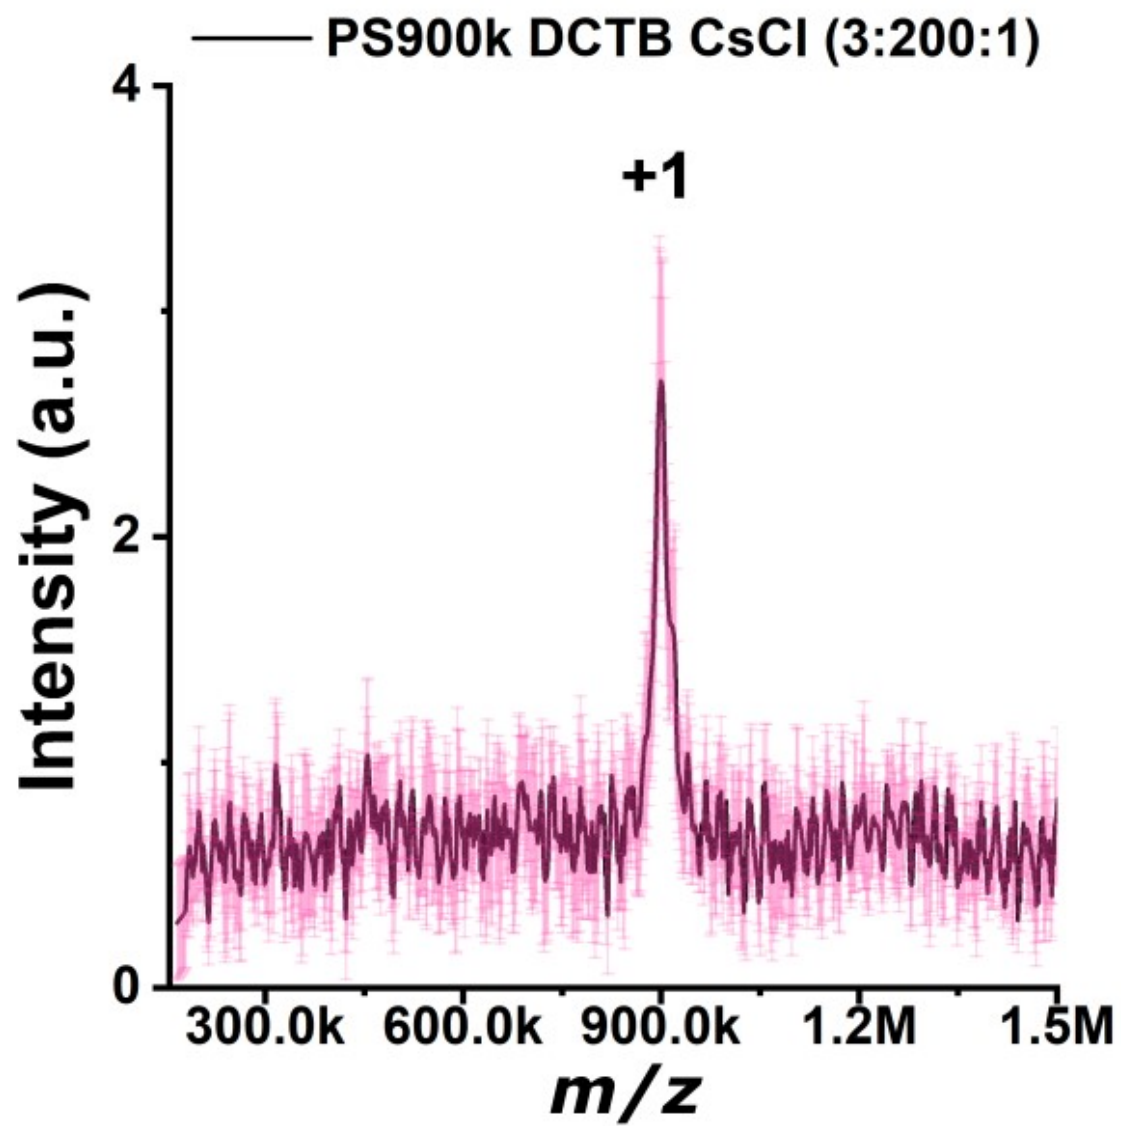

Figure S4 Mass spectra of PS900k obtained with a DCTB matrix using CsCl salt.

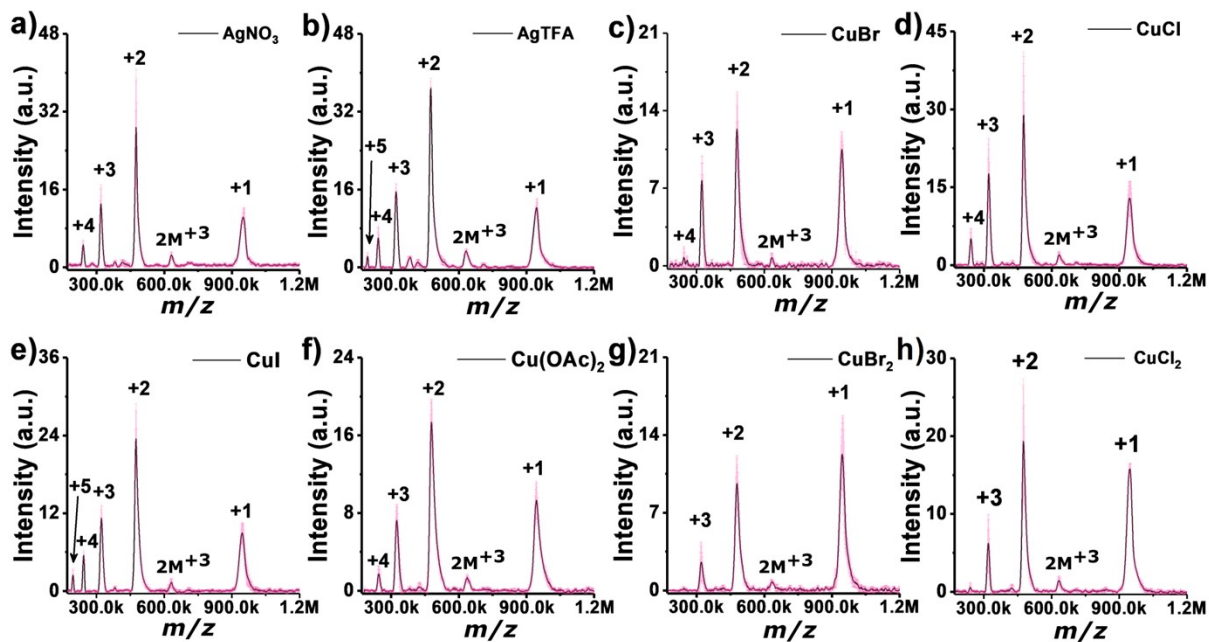

Figure S5 Mass spectra of PS900k obtained with a DCTB matrix using various cationizing reagents with a) AgTFA, b) AgNO<sub>3</sub>, c) CuI, d) CuBr, e) CuCl, f) CuBr<sub>2</sub>, g) CuCl<sub>2</sub>, and h) Cu(OAc)<sub>2</sub>. The optimal ratio of PS : matrix : cationizing reagent was 3:200:1 (v/v/v).

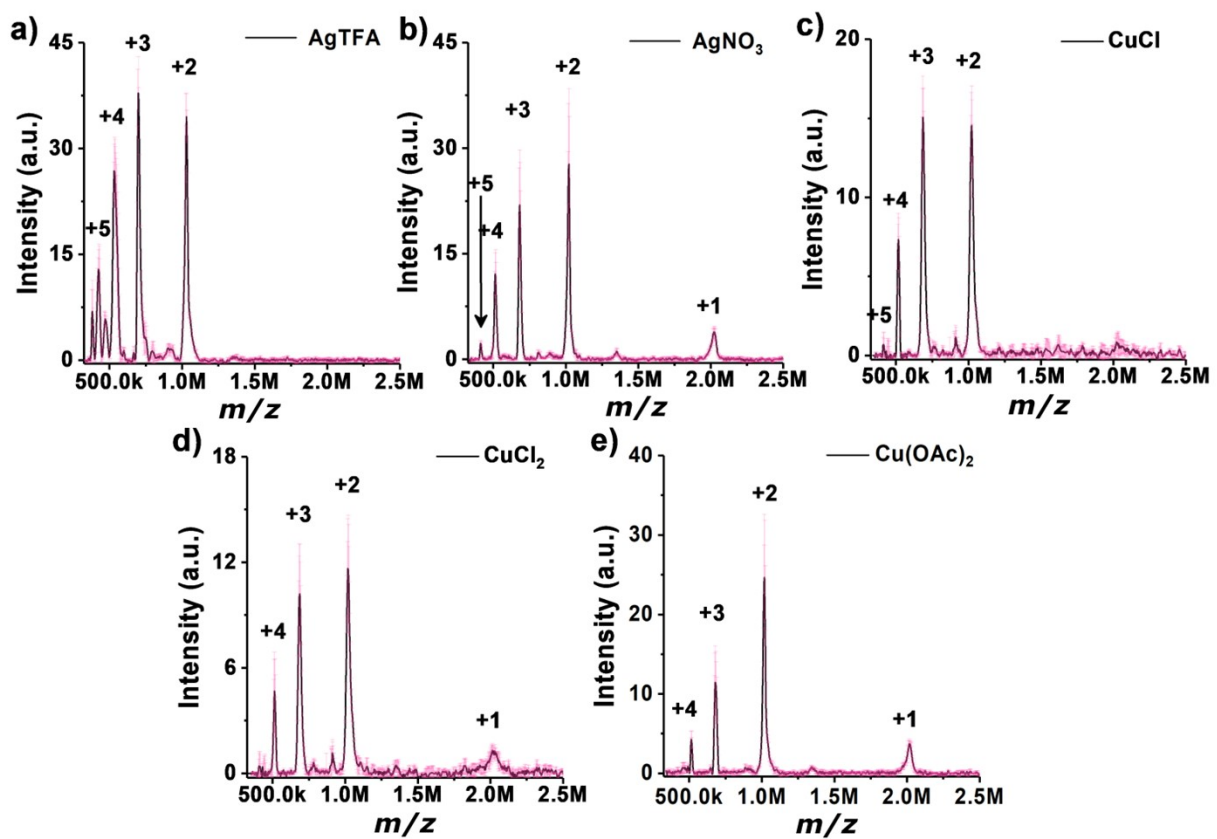

Figure S6 Mass spectra of PS2M obtained with a DCTB matrix using cationizing reagents with a) AgTFA, b) AgNO<sub>3</sub>, c) CuCl, d) CuCl<sub>2</sub>, and e) Cu(OAc)<sub>2</sub>. The optimal ratio of PS : matrix : cationizing reagent was 3:200:1 (v/v/v).



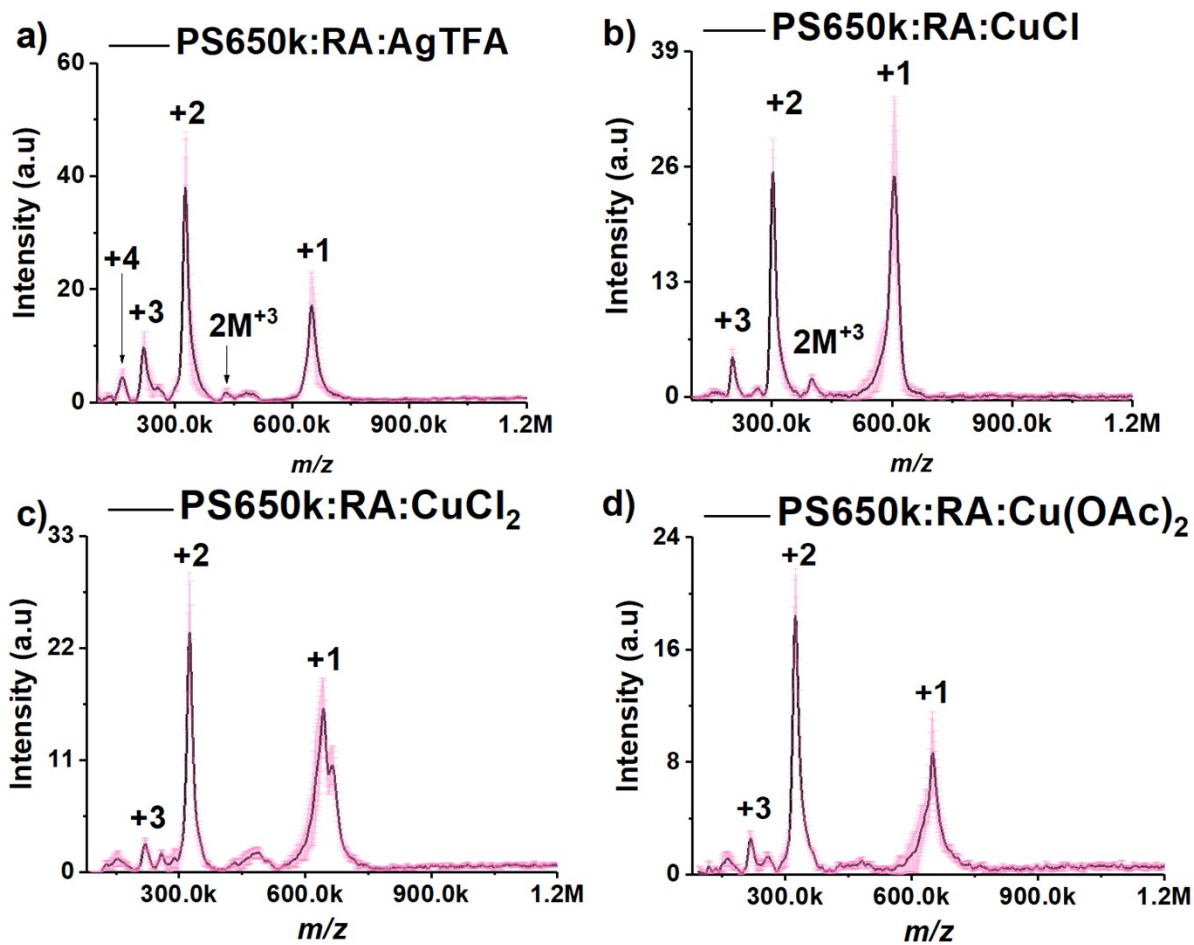

Figure S7 Mass spectra of PS650k obtained with a RA matrix using various cationizing reagents with a) AgTFA, b) CuCl, c) CuCl<sub>2</sub>, and d) Cu(OAc)<sub>2</sub>. The optimal ratio of PS : matrix : cationizing reagent was 3:200:1 (v/v/v).

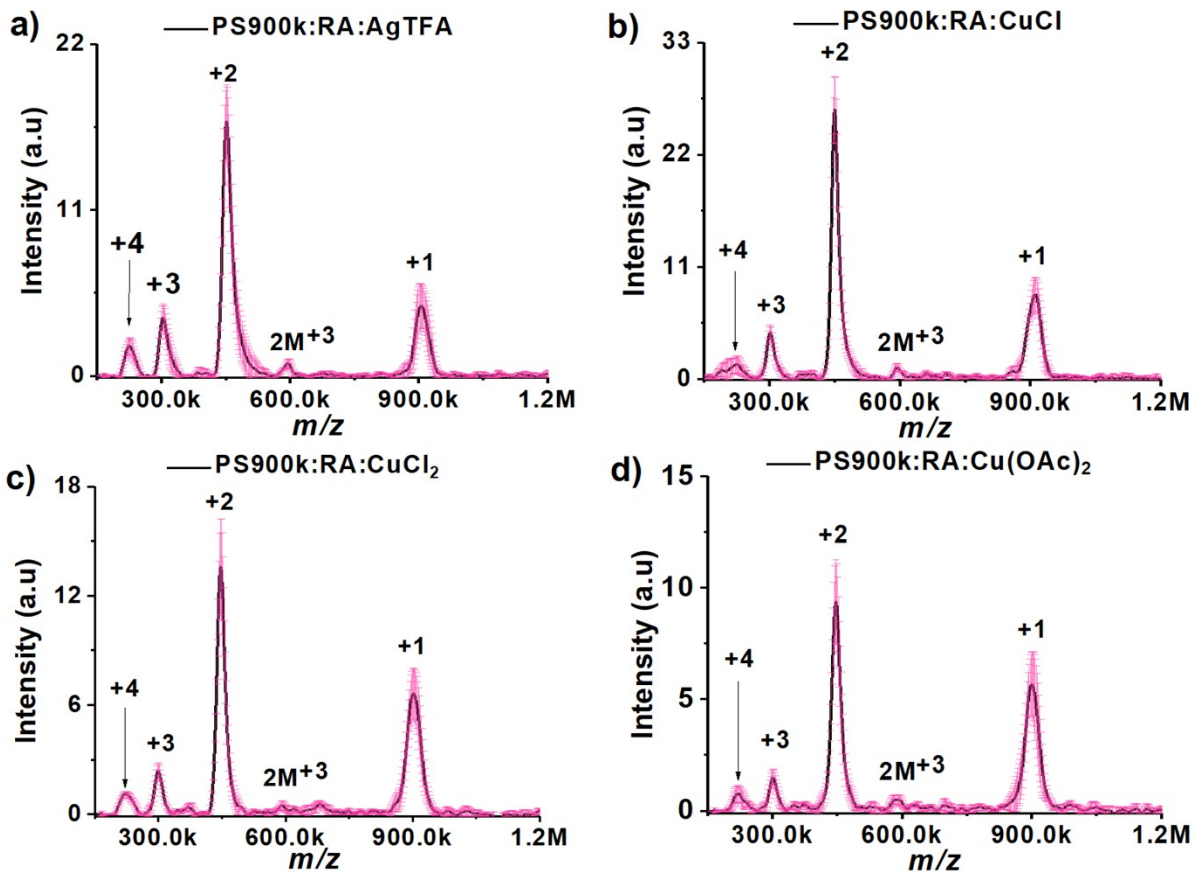

Figure S8 Mass spectra of PS900k obtained with a RA matrix using various cationizing reagents with a) AgTFA, b) CuCl, c) CuCl<sub>2</sub>, and d) Cu(OAc)<sub>2</sub>. The optimal ratio of PS : matrix : cationizing reagent was 3:200:1 (v/v/v).

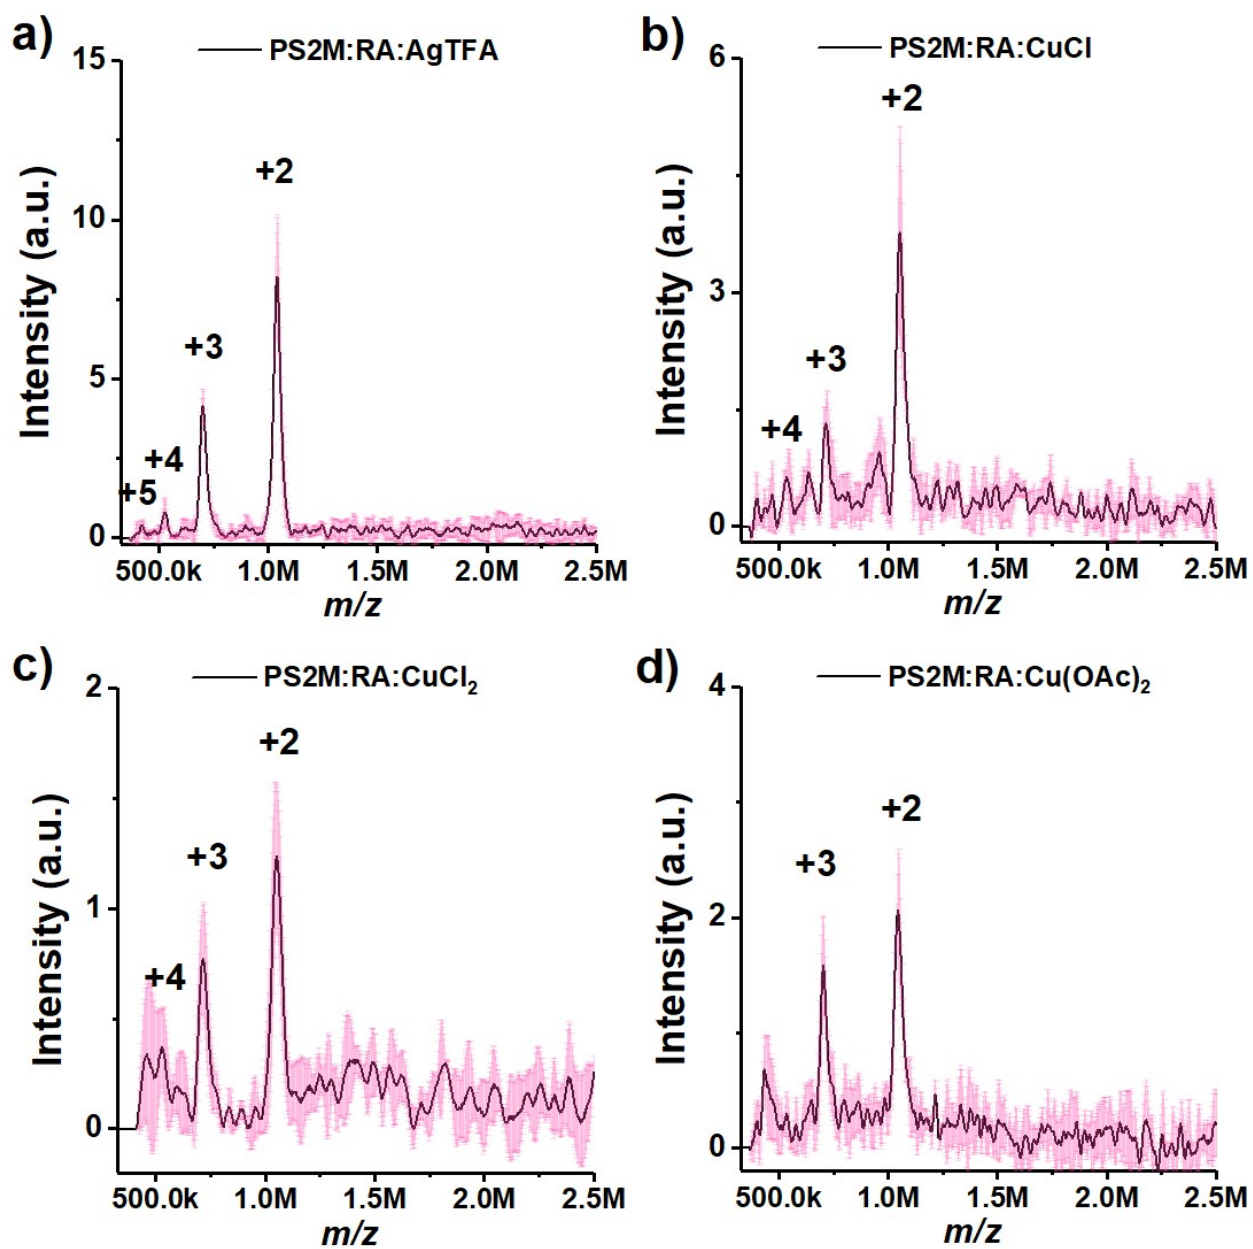

Figure S9 Mass spectra of PS2M obtained with a RA matrix using various cationizing reagents with a) AgTFA, b) CuCl, c) CuCl<sub>2</sub>, and d) Cu(OAc)<sub>2</sub>. The optimal ratio of PS : matrix : cationizing reagent was 3:200:2 (v/v/v).
